# Supplementary material
Source: Springer Nature journal article supplement (https://www.springermedizin.de/resource/supplementary/12888_2012_1096_MOESM2_ESM.pdf/9478994)

**A.** L Sup FG (BA9)-6,53,32  
Combined traits

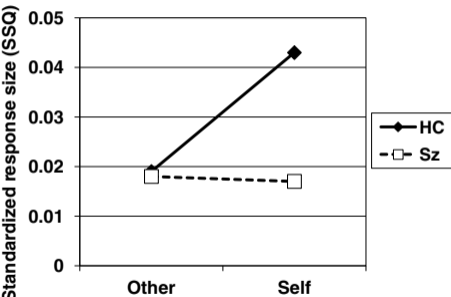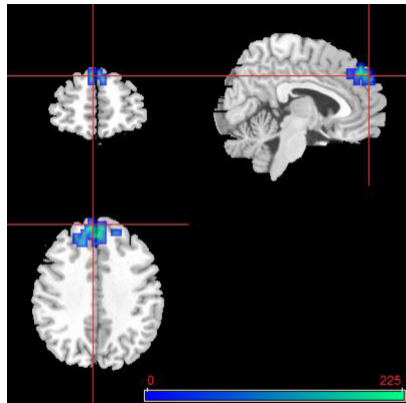

**B.** 3-D map of cluster. HC>Sz during self-evaluation.

Supplement: MOESM2 [file 9478994]
